# Supplementary material for: Mechanosynthesis of Diaminobiphenyls-Based Schiff’s Bases as Simple Probes for the Naked-Eye Detection of Cyanide Ion
Source: MDPI journal article supplement (doi:10.3390/chemistry5020066), 2023-04-25
Supplement: s1 [file s1]

Archive with 1 entries (1 files):
- chemistry-2283764-supplementary.pdf
