# Supplementary material for: Mechanosynthesis of Diaminobiphenyls-Based Schiff’s Bases as Simple Probes for the Naked-Eye Detection of Cyanide Ion
Source: MDPI journal article supplement (doi:10.3390/chemistry5020066), 2023-04-25
Supplement: s1 [file s1 › chemistry-2283764-supplementary.pdf]

## Electronic Supplementary Information

### **Mechanosynthesis of diaminobiphenyls-based Schiff's bases as simple probes for the naked-eye detection of cyanide ion**

**Wahab K. A. Al-Ithawi<sup>1,3</sup>, Albert F. Khasanov<sup>1</sup>, Igor S. Kovalev<sup>1</sup>, Igor L. Nikonov<sup>1,2</sup>, Dmitry S. Kopchuk<sup>1,2</sup>, Vadim A. Platonov<sup>1</sup>, Sougata Santra<sup>1</sup>, Grigory V. Zyryanov<sup>1,2\*</sup>, Brindaban C. Ranu<sup>1,4</sup>**

<sup>1</sup> Chemical Engineering Institute, Ural Federal University, 19 Mira St., Yekaterinburg 620 002, Russian Federation

<sup>2</sup> I. Ya. Postovsky Institute of Organic Synthesis of RAS (Ural Division), 22/20 S. Kovalevskoy/Akademicheskaya St., Yekaterinburg 620219, Russian Federation

<sup>3</sup> University of Technology-Iraq, Baghdad, 10066, Iraq

<sup>4</sup> School of Chemical Sciences, Indian Association for the Cultivation of Science, Jadavpur, Kolkata – 700 032, India

\* Correspondence: gvzyryanov@gmail.com;.

## **Experimental part.**

### *General method for the synthesis of iodo-3-nitrobenzene.*

To a solution of 3-nitroaniline (5g, 36.23 mmol) and aqueous H<sub>2</sub>SO<sub>4</sub> (45 ml) at 0-5 °C a solution of sodium nitrite (2.622g, 38mmol) in water was added dropwise to form diazonium salt confirmed by 2-naphthol paper detector. The resulted diazonium salt was filtered under reduced pressure. After that a solution of potassium iodide (24g, 145 mmol) was added at 60-100 °C for 1 h. The completeness of the reaction was monitored by TLC using (DCM:hexane 30:70). The product was extracted by ethyl acetate, washed with aqueous sodium thiosulfate and dried over sodium sulphate. The solvent was removed under reduced pressure. The product was purified by column chromatography (DCM:hexane 30:70). Yield 56%. Light-yellow powder. M.p (36-38°C), MS [M+H] 249. <sup>1</sup>H NMR (400MHz) δ:8.5 (s, 1H, 2-H), 8.26-8.20 (m, 2H, 4-H, 5-H, 7.47 (t, 1H, J=8.08 Hz, 6-H).

### *General method for the synthesis of 3,3'-dinitro-1,1'-biphenyl*

A mixture of 1-iodo-3-nitrobenzene (3g, 12 mmol), Pd(OAc)<sub>2</sub> (10 mol.%) and dry potassium carbonate (4g 30mmol) in dry DMF (10 mL) was stirred at 130 °C for 12h under Ar atmosphere. The resulted mixture was extracted by ethyl acetate, washed with water and dried over sodium sulphate. The organic phase was concentrated under reduced pressure. The product was purified by column chromatography (DCM :hexane (30:70)). Yellow powder. M.p 205-206 °C.Yield 82%. MS [M+H] = 244 <sup>1</sup>H NMR (400 MHz) δ: 8.30 (s, 2H, 2-H, 2'-H), 8.32-8.27 (m, 4H, 4-H, 4'-H, 5-H, 5'-H), 7.83 (t, 2H, 6-H, 6'-H, J=8.04 Hz).

### *General method for the synthesis of corresponding [1,1'-biphenyl]-diamine.*

To a solution of the corresponding dinitro-1,1'-biphenyl (500mg) in THF Pd/C (10% wt., 50mg) was added. The reaction mixture was stirred under hydrogen atmosphere. The reaction mixture was filtered through the celite and purified by column chromatography with ethyl acetate. Yield 96%. Yellow powder. M.p 88-89°C, MS [M+H]<sup>+</sup>=184. <sup>1</sup>H NMR (400 MHz) δ: 7.04 (t, 2H, J=7.8 Hz, 5-H, 5'-H), 6.75 (s, 2H, 2-H), 6.67 (d, 2H, J=7.84 Hz, 4-H, 4'-H), 6.51 (dd, 2H, <sup>3</sup>J=1.24 Hz, <sup>4</sup>J=1.13 Hz, 6-H, 6'-H).

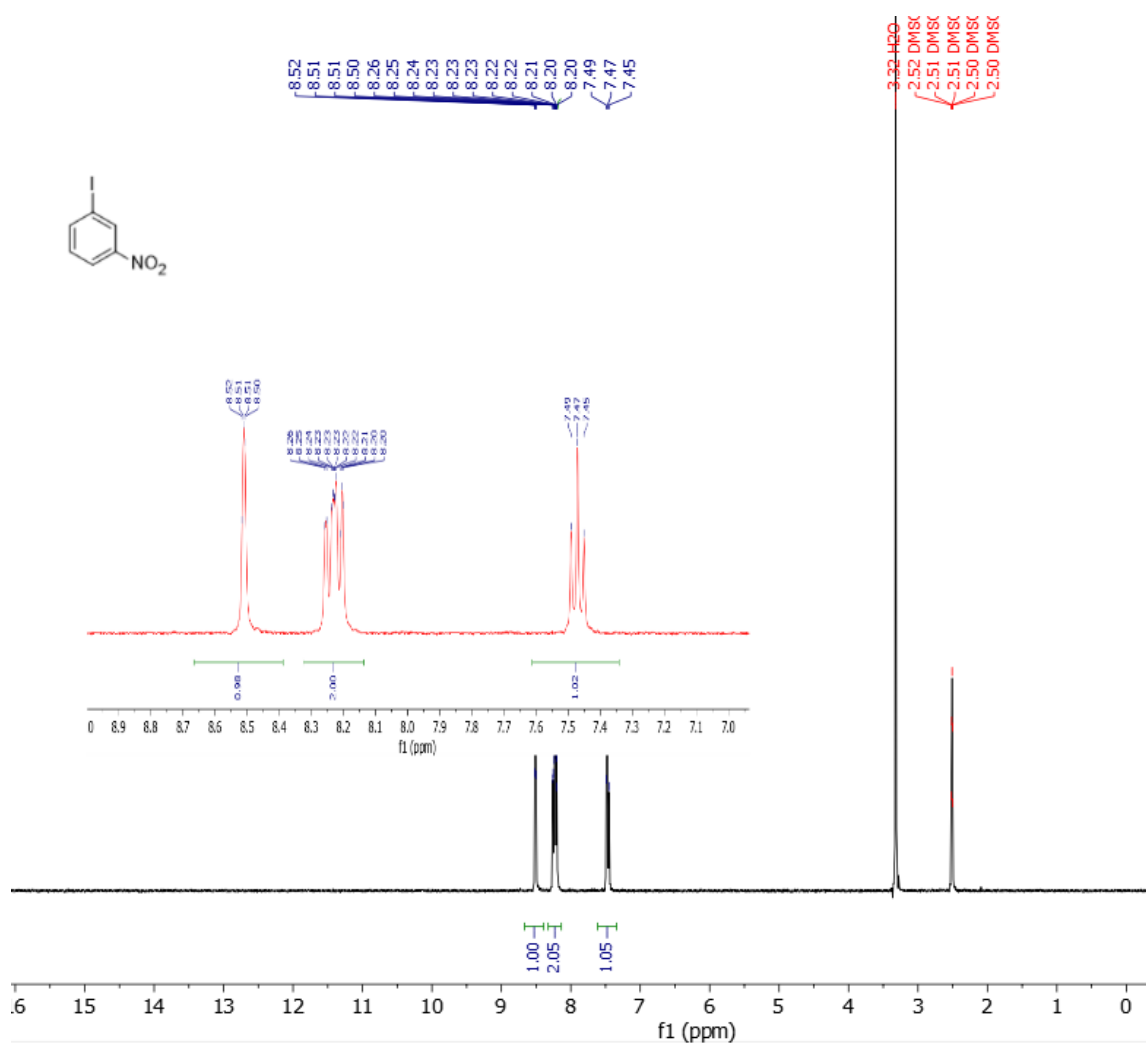

**Figure S1.** <sup>1</sup>H NMR spectrum of the iodo-3-nitrobenzen in DMSO-*d*<sub>6</sub> at r.t

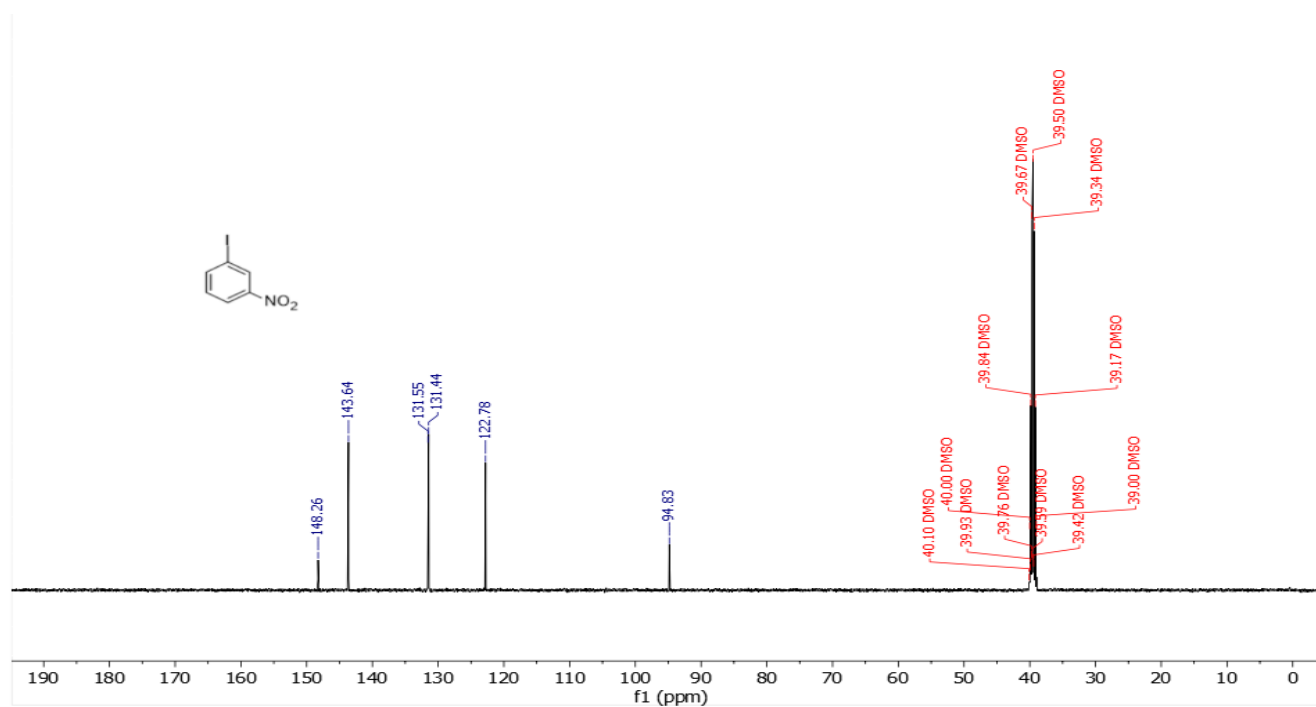

**Figure S2.**  $^{13}\text{C}$  NMR spectrum of the 1-iodo-3-nitrobenzen in  $\text{DMSO-}d_6$  at r.t

Line#: 1 R.Time:0.063(Scan#:6)

MassPeaks:24

RawMode:Single 0.063(6) BasePeak:76(5718456)

Фон.реж.:None Group 1 - Event 1

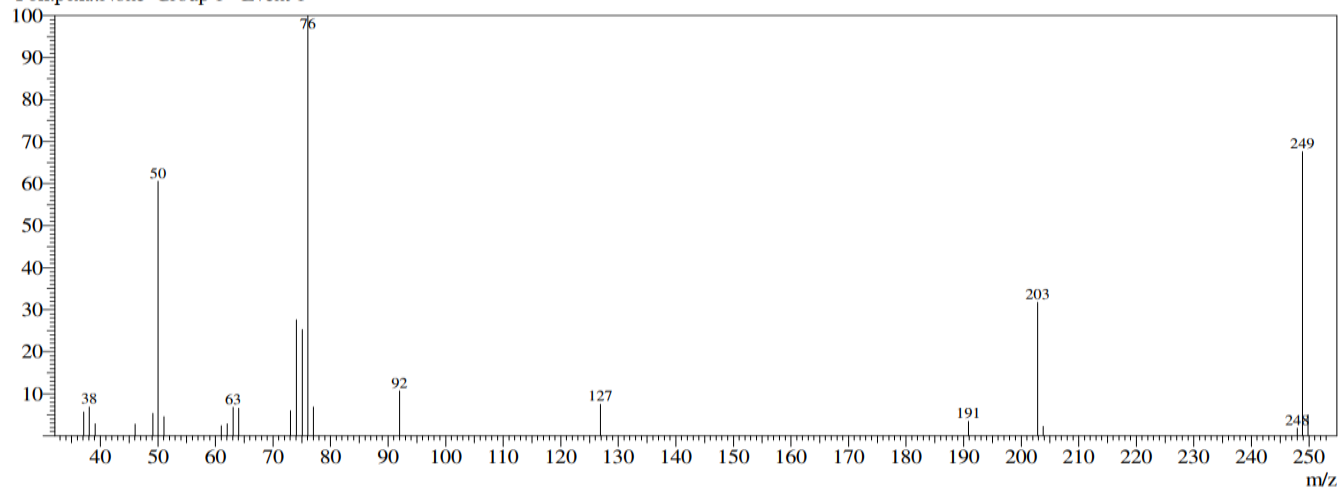

**Figure S3.** Mass spectrum of the iodo-3-nitrobenzen

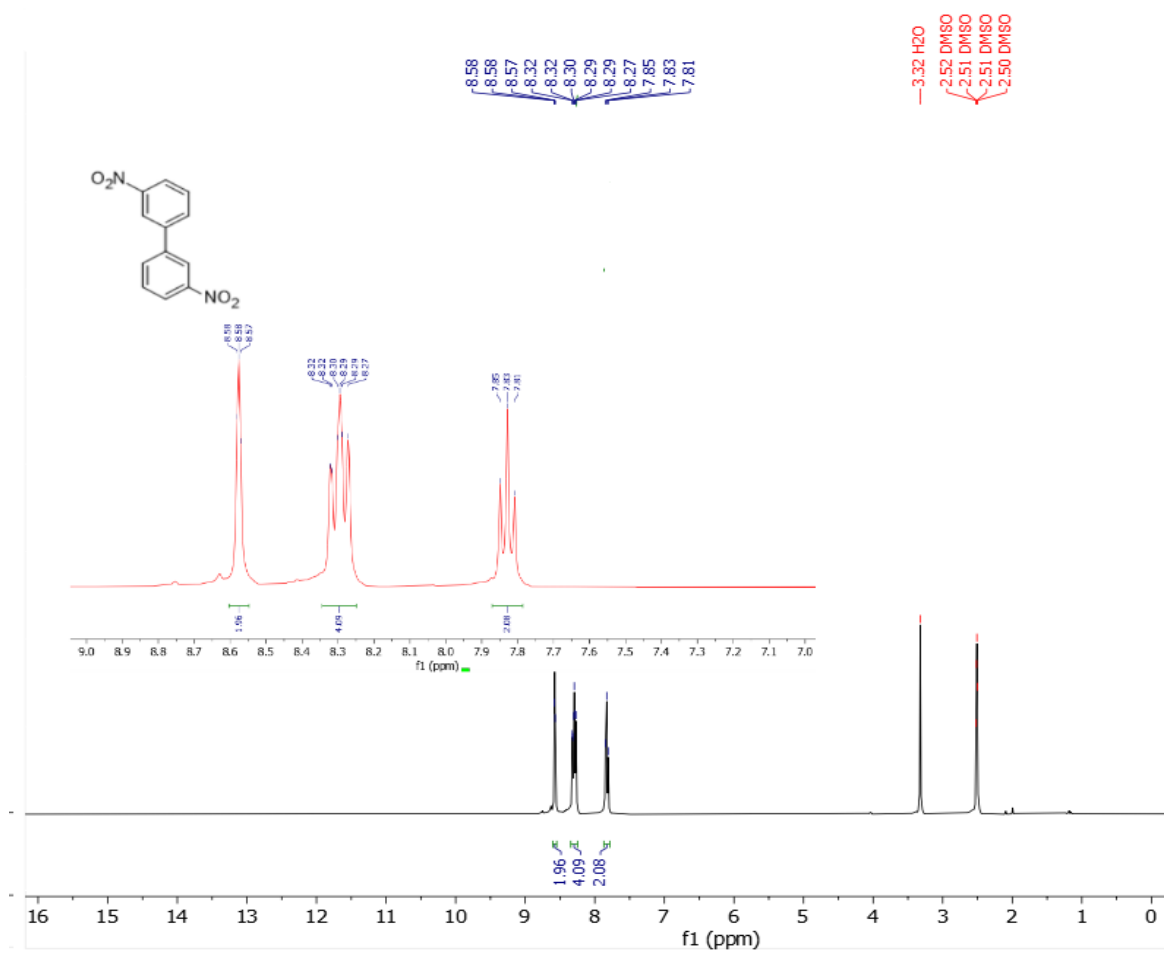

Figure S4. <sup>1</sup>H NMR spectrum of the 3,3'-dinitro-1,1'-biphenyl in DMSO-*d*<sub>6</sub> at r.t

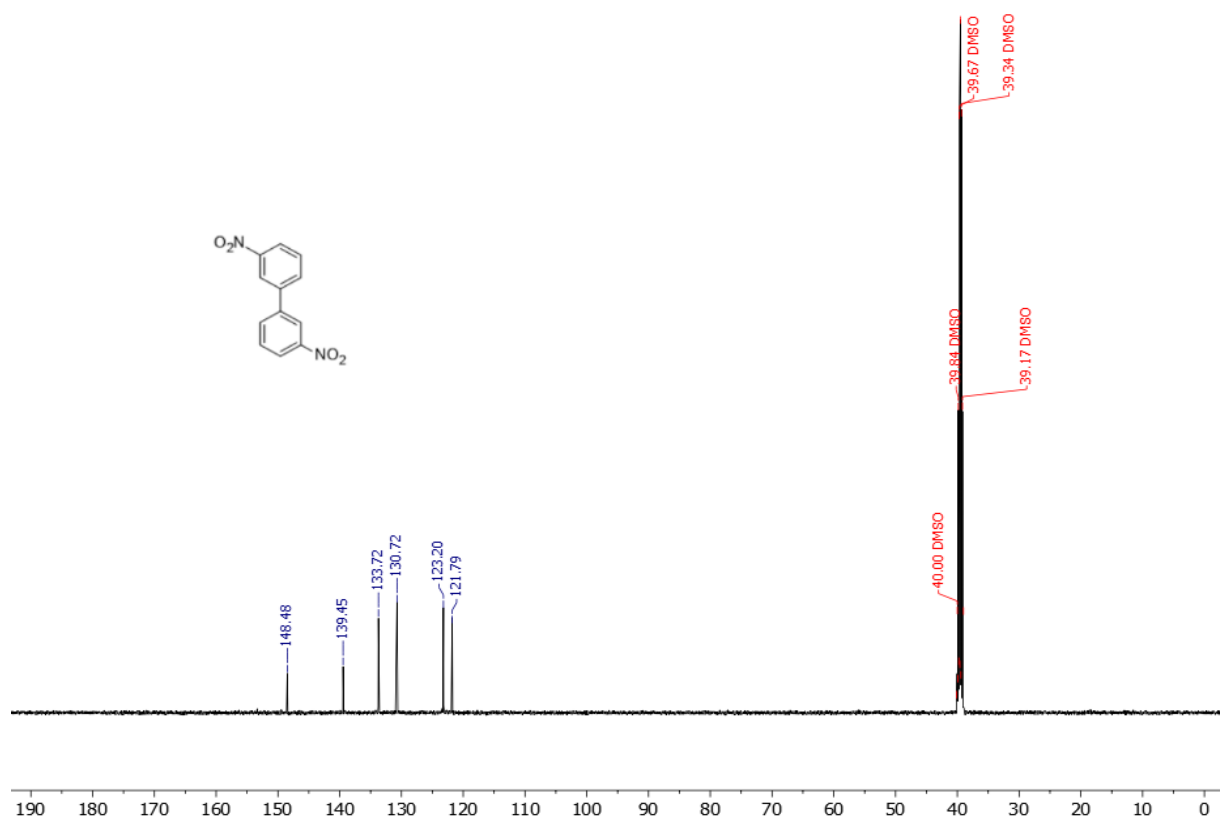

**Figure S5.** <sup>13</sup>C NMR spectrum of the 3,3'-dinitro-1,1'-biphenyl in DMSO-*d*<sub>6</sub> at r.

Line#:1 R.Time:2.775(Scan#:1091)

MassPeaks:54

RawMode:Single 2.775(1091) BasePeak:244(3315102)

Фон.реж.:1.413(546) Group 1 - Event 1

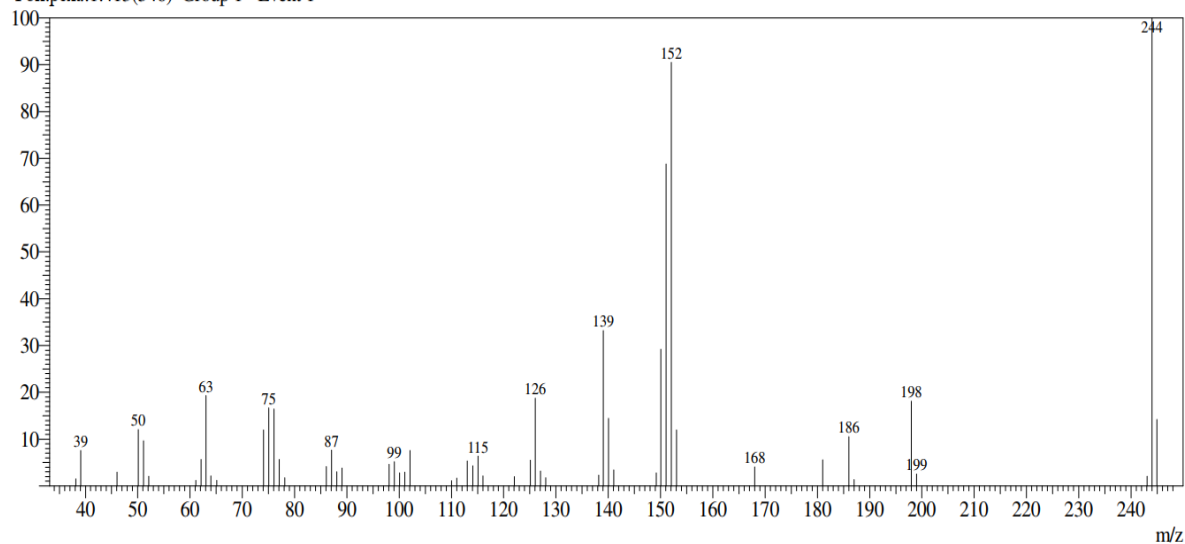

**Figure S6.** Mass spectrum of 3,3'-dinitro-1,1'-biphenyl

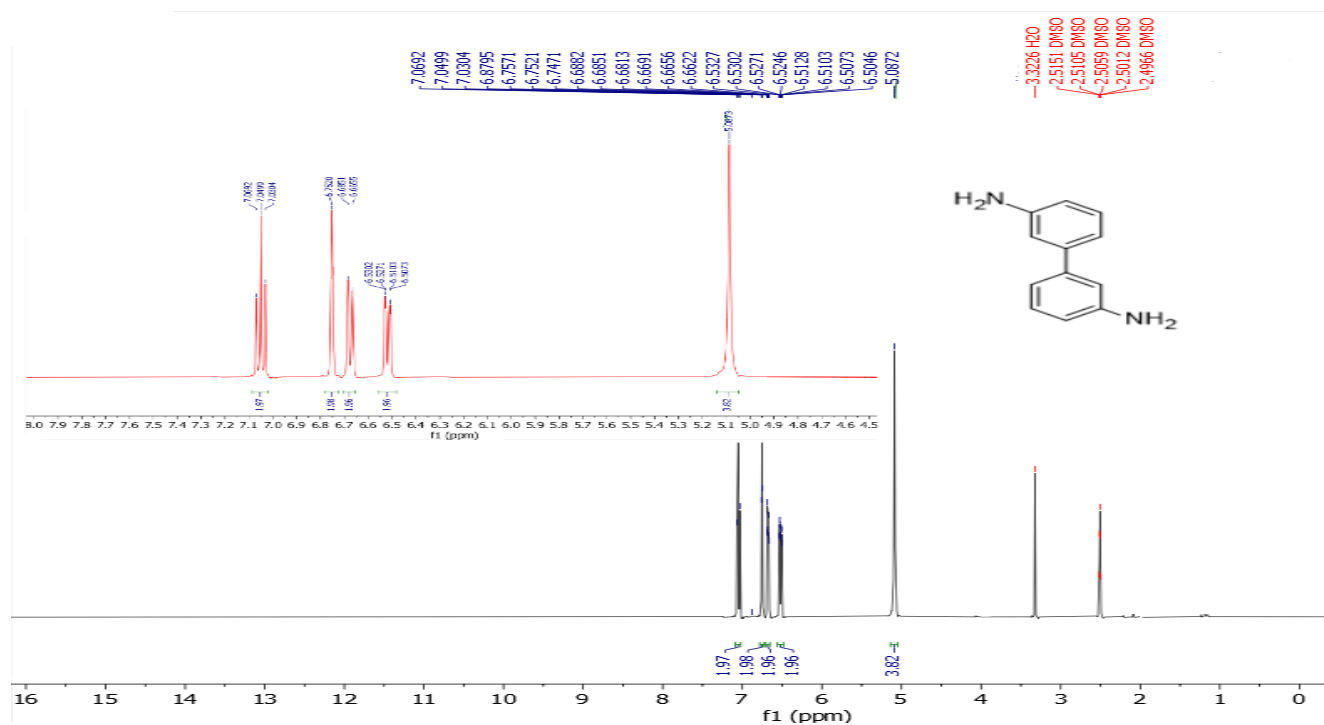

Figure S7. <sup>1</sup>H NMR spectrum of the 3,3'-dinitro-1,1'-biphenyl in DMSO-*d*<sub>6</sub> at r.t

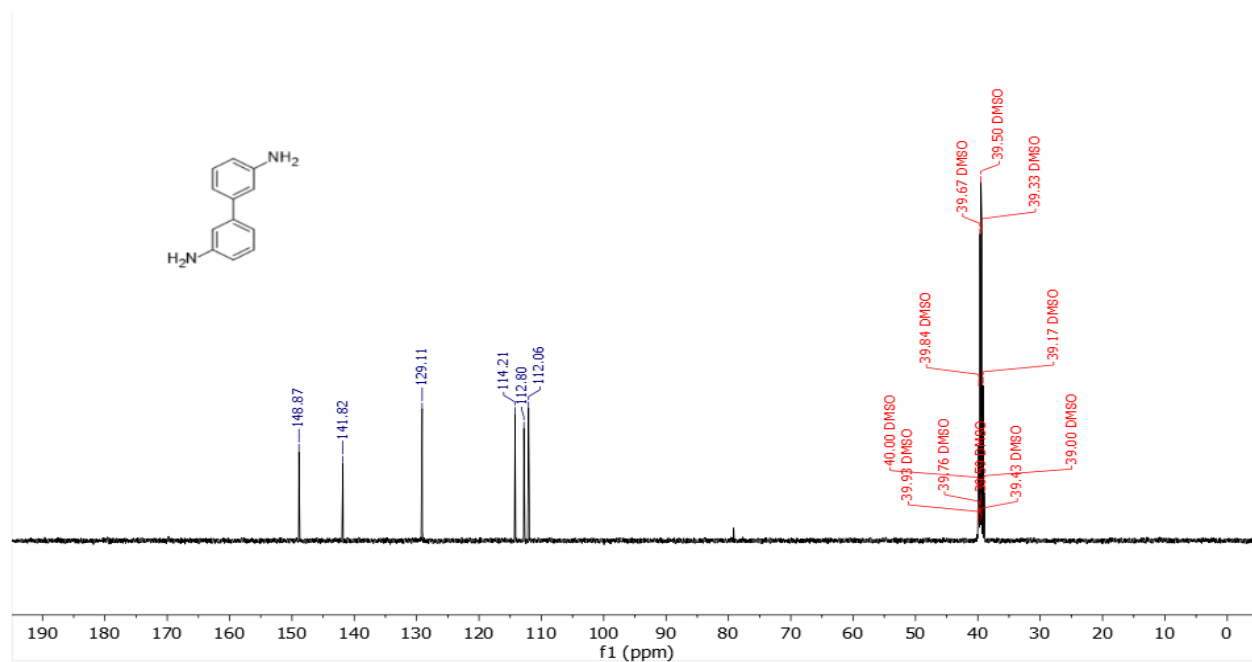

Figure S8. <sup>13</sup>C NMR spectrum of the 3,3'-dinitro-1,1'-biphenyl in DMSO-*d*<sub>6</sub> at r.t

Line#:1 R.Time:2.635(Scan#:1015)  
 MassPeaks:87  
 RawMode:Single 2.635(1015) BasePeak:184(6390102)  
 Фон.реж.:2.978(1152) Group 1 - Event 1

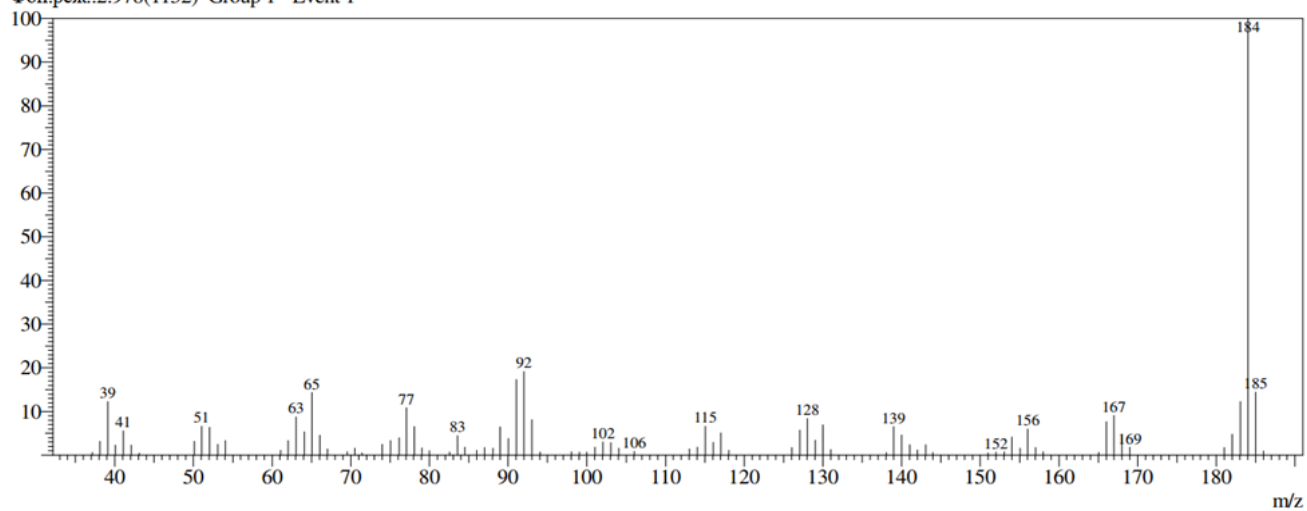

**Figure S9.** Mass spectrum of [1,1'-biphenyl]-3,3'-diamine.

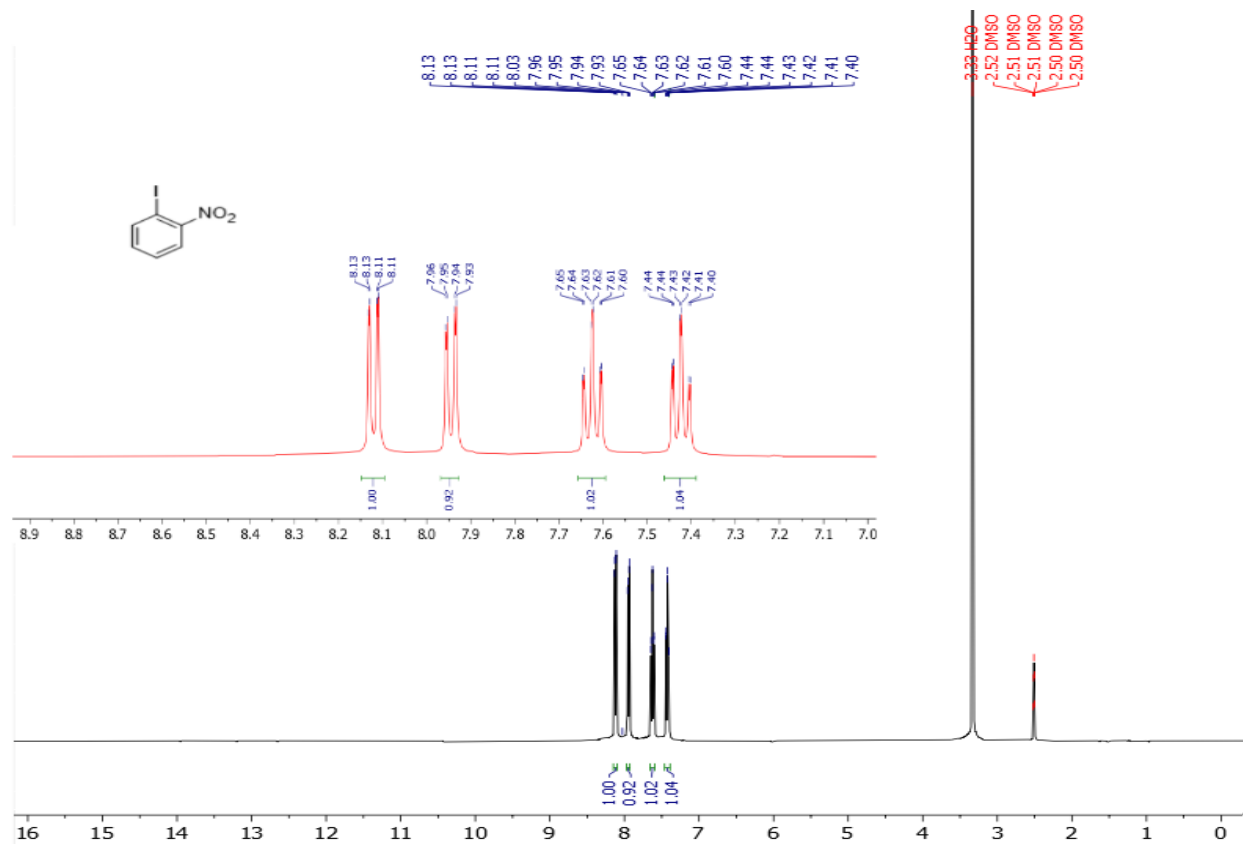

**Figure S10.**  $^1\text{H}$  NMR spectrum of the iodo -2-nitrobenzen in DMSO- $d_6$  at r.t

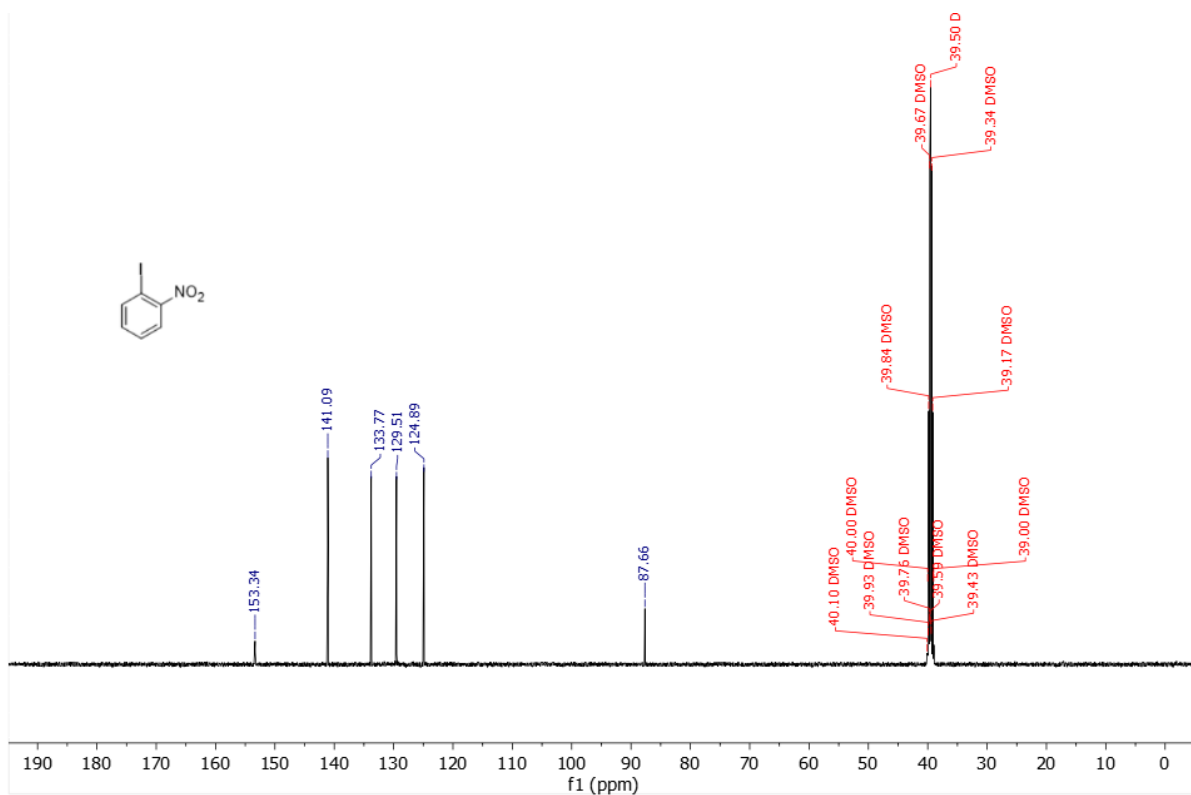

**Figure S11.** <sup>13</sup>C NMR spectrum of the 1-iodo -2-nitrobenzen in DMSO-*d*<sub>6</sub> at r.t

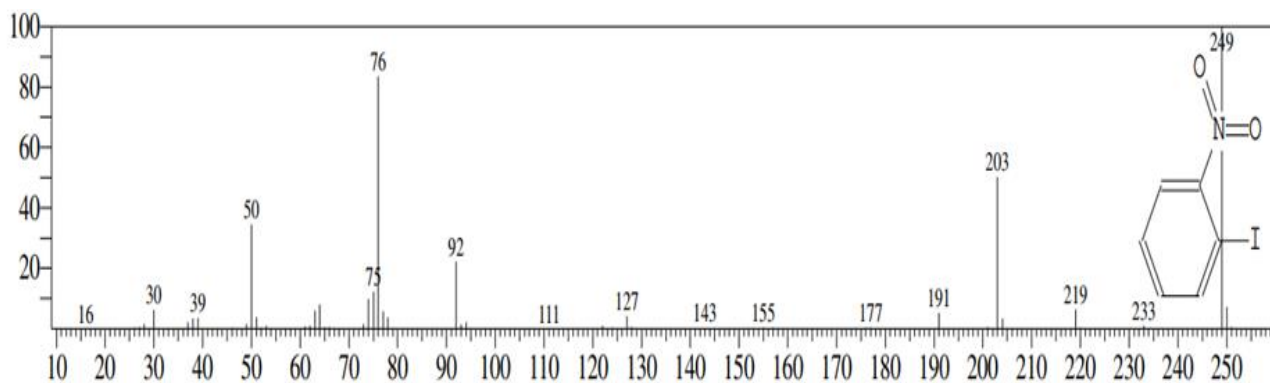

**Figure S12.** Mass spectrum of iodo -2-nitrobenzen r.t

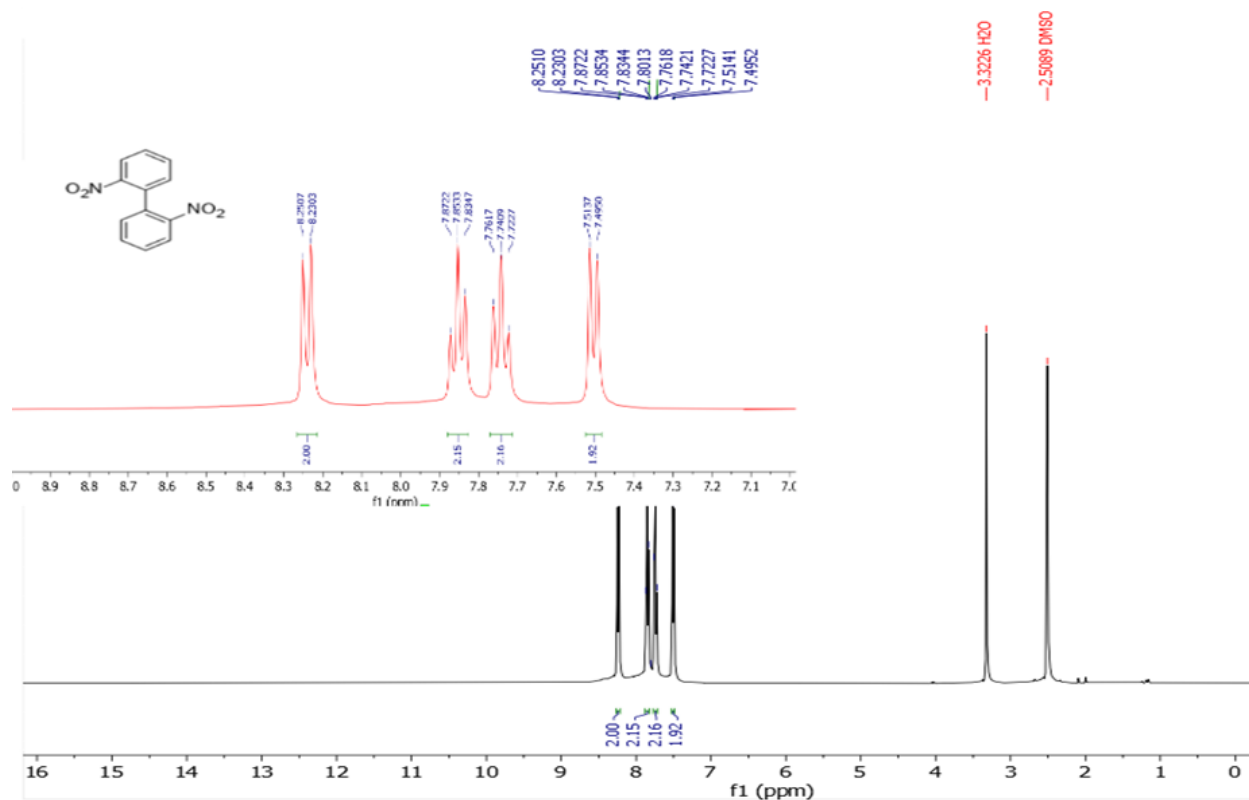

Figure S13. <sup>1</sup>H NMR spectrum of the 2,2'-dinitro-1,1'-biphenyl in DMSO-*d*<sub>6</sub> at r.t

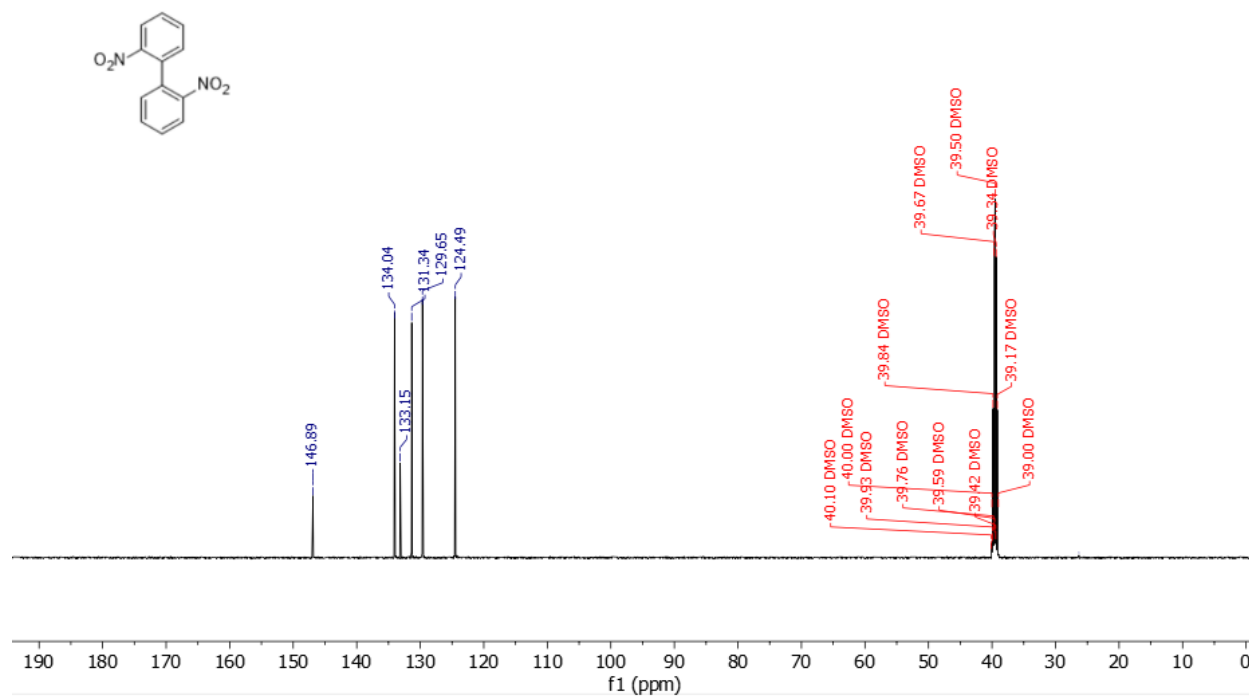

**Figure S14.**  $^{13}\text{C}$  NMR spectrum of the 2,2'-dinitro-1,1'-biphenyl in DMSO- $d_6$  at r.t

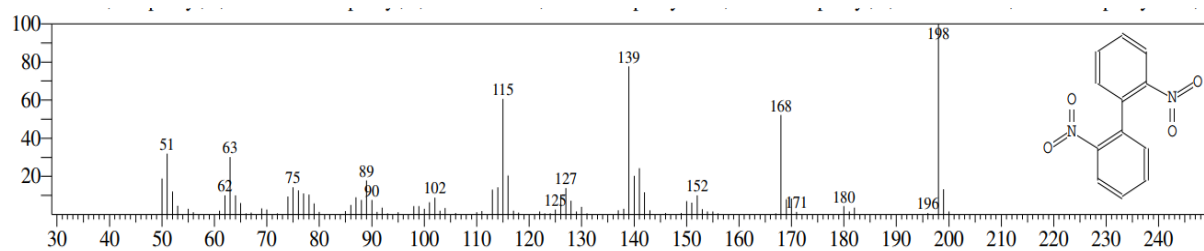

**Figure S15.** Mass spectrum of 2,2'-dinitro-1,1'-biphenyl r.t

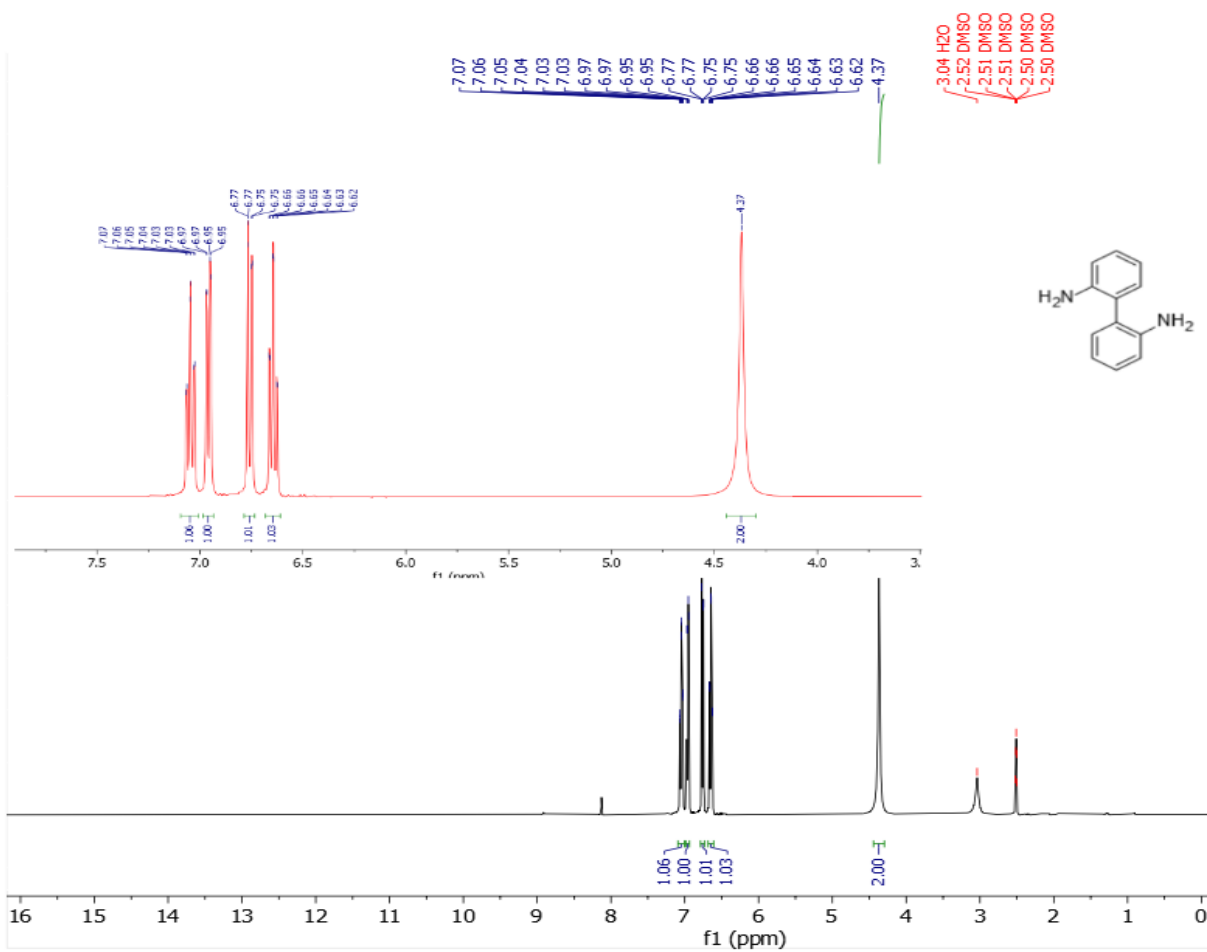

**Figure S16.**  $^1\text{H}$  NMR spectrum of [1,1'-biphenyl]-2,2'-diamine in DMSO- $d_6$  at r.t

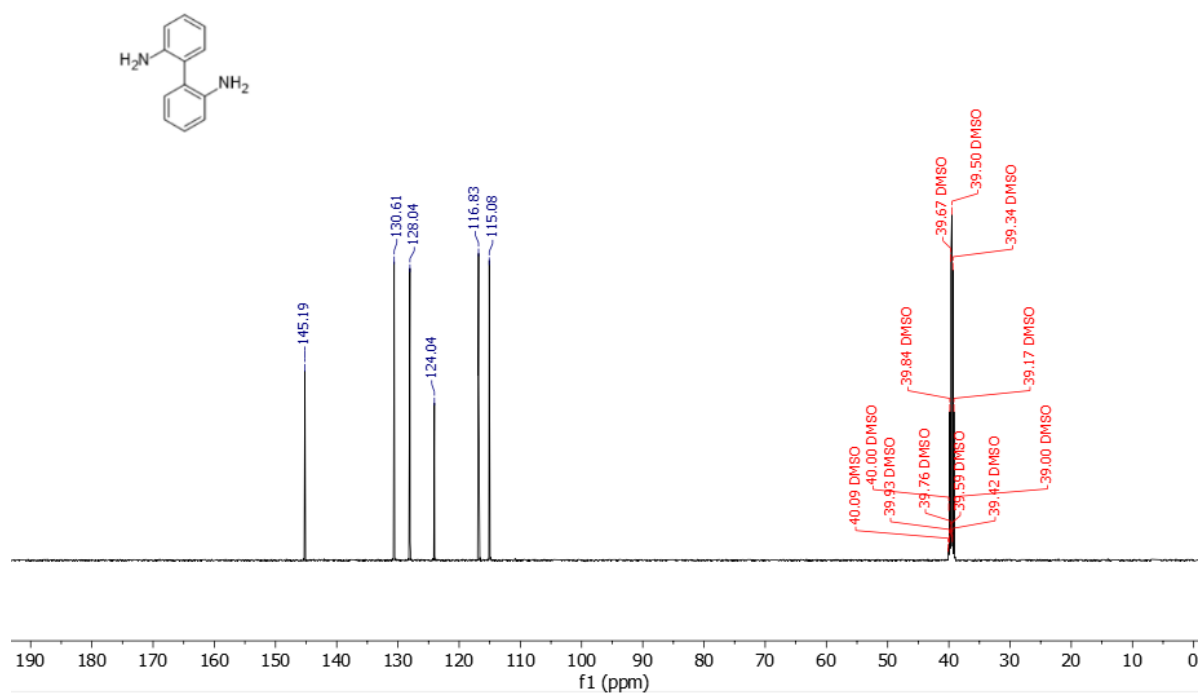

**Figure S17.** <sup>1</sup>H NMR spectrum of [1,1'-biphenyl]-2,2'-diamine] in DMSO-*d*<sub>6</sub> at r.t.

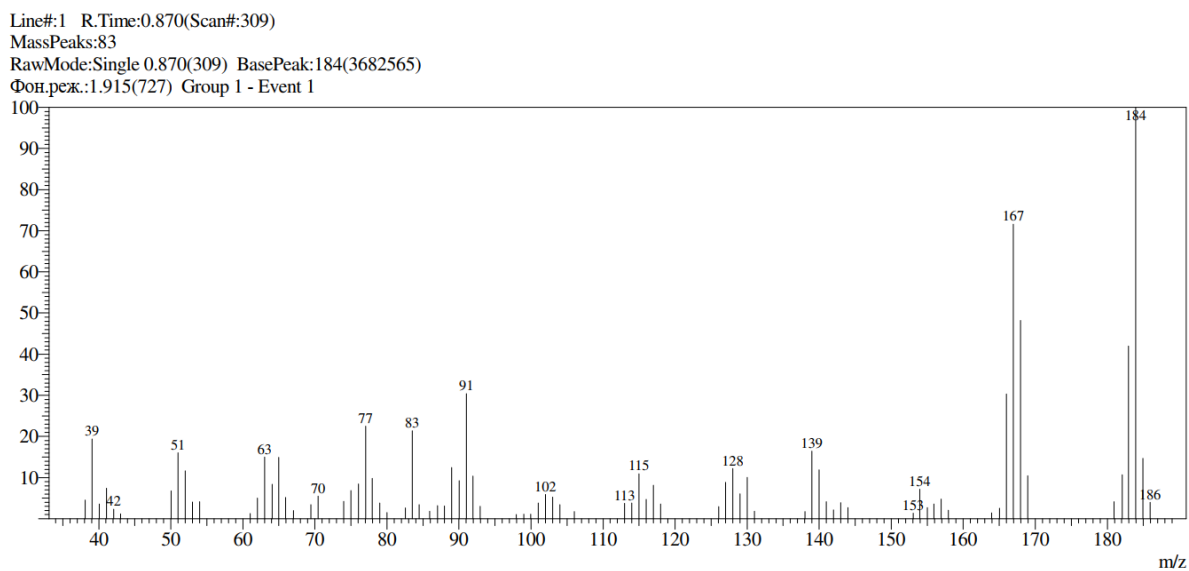

**Figure S18.** Mass spectrum of [1,1'-biphenyl]-2,2'-diamine]

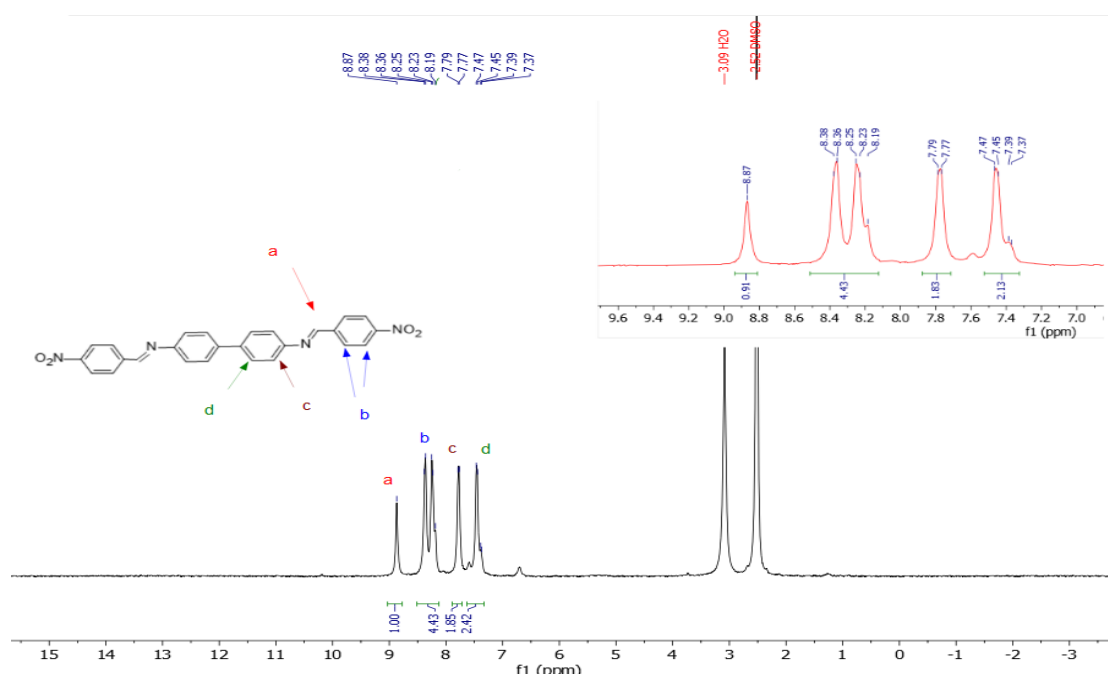

**Figure S19** <sup>1</sup>H NMR of chemosensor S1 in DMSO-*d*<sub>6</sub>

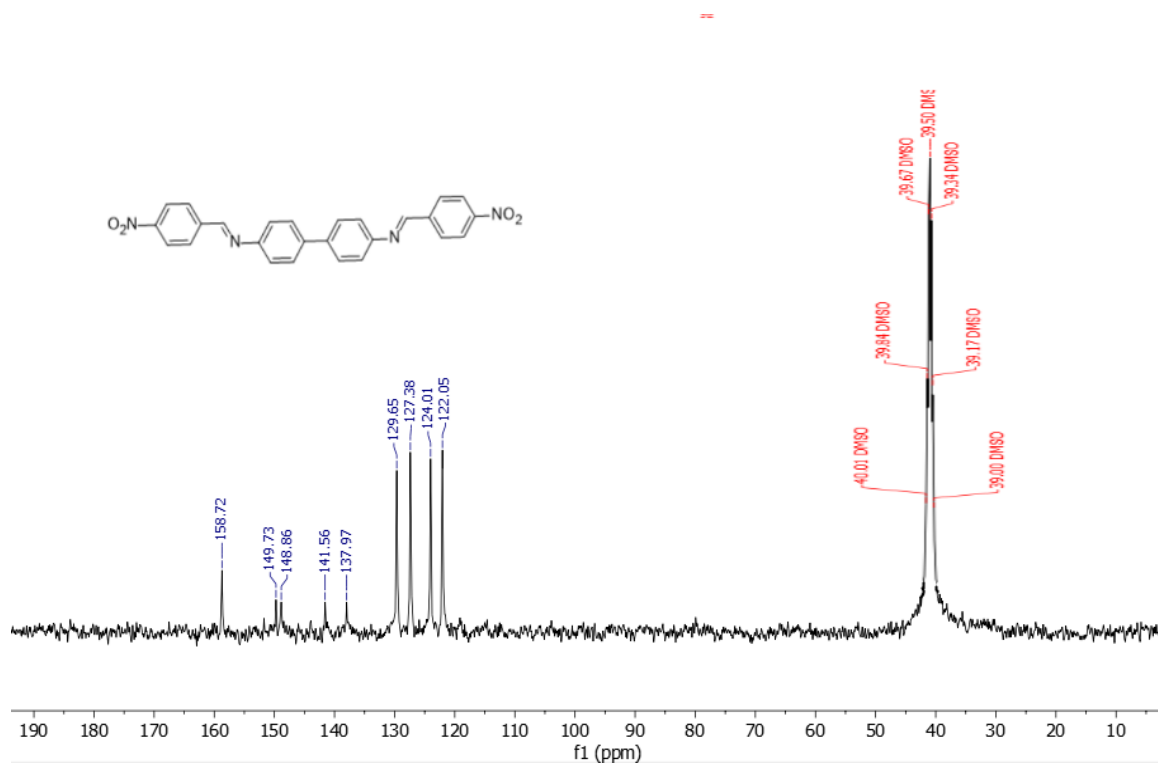

**Figure S20.** <sup>13</sup>C of chemosensor S1 in DMSO-*d*<sub>6</sub>

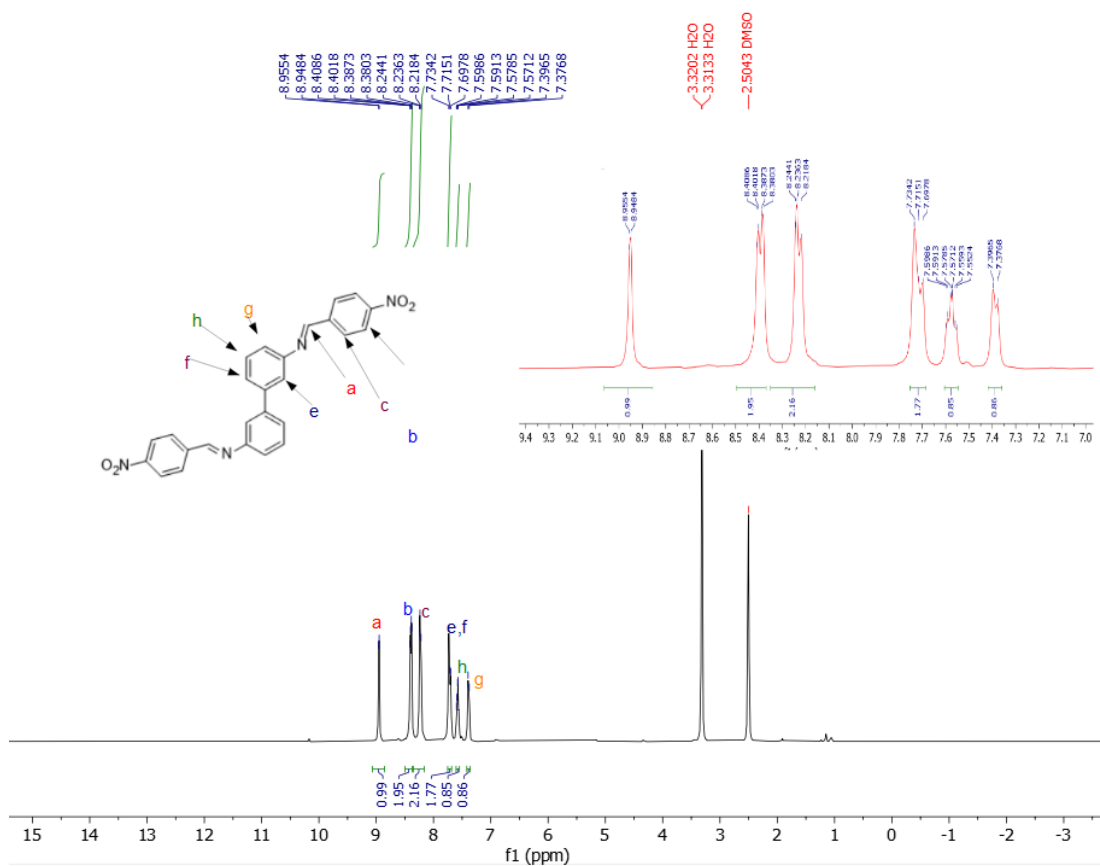

**Figure S21.** <sup>1</sup>H NMR of chemosensor S2 in DMSO-*d*<sub>6</sub>

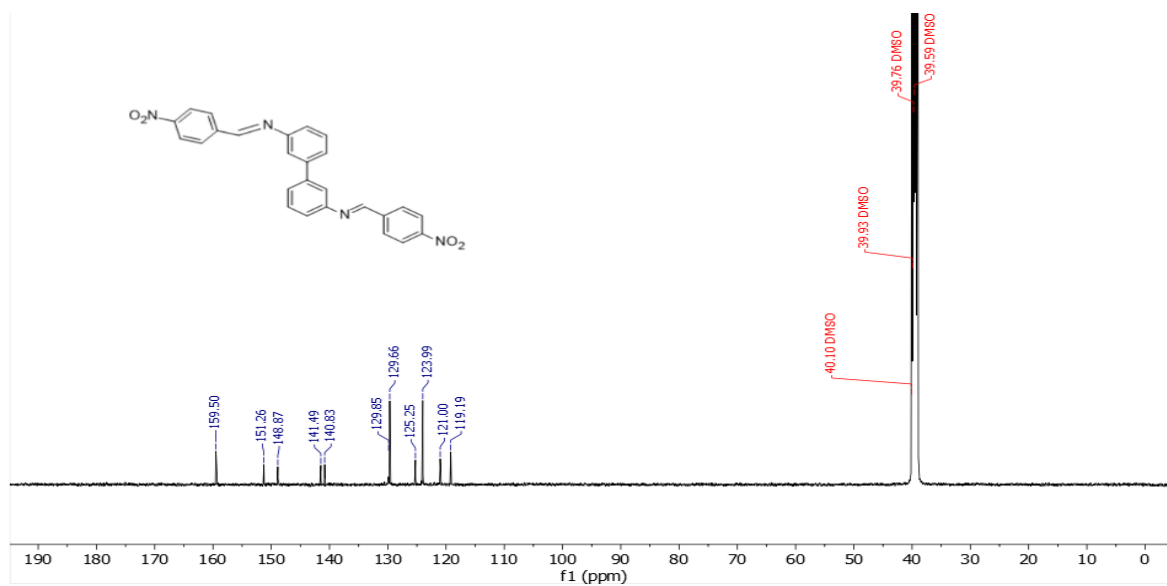

**Figure S22.** <sup>13</sup>C of chemosensor S2 in DMSO-*d*<sub>6</sub>

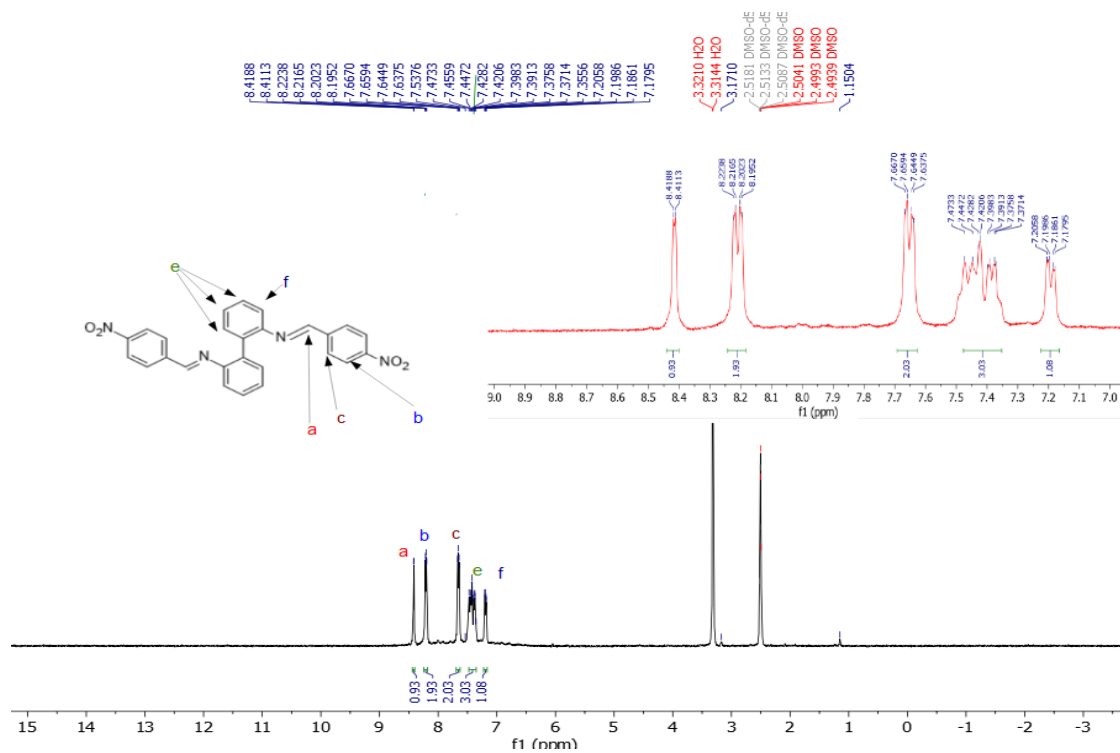

Figure S22 <sup>1</sup>H NMR of chemosensor S3 in DMSO-*d*<sub>6</sub>

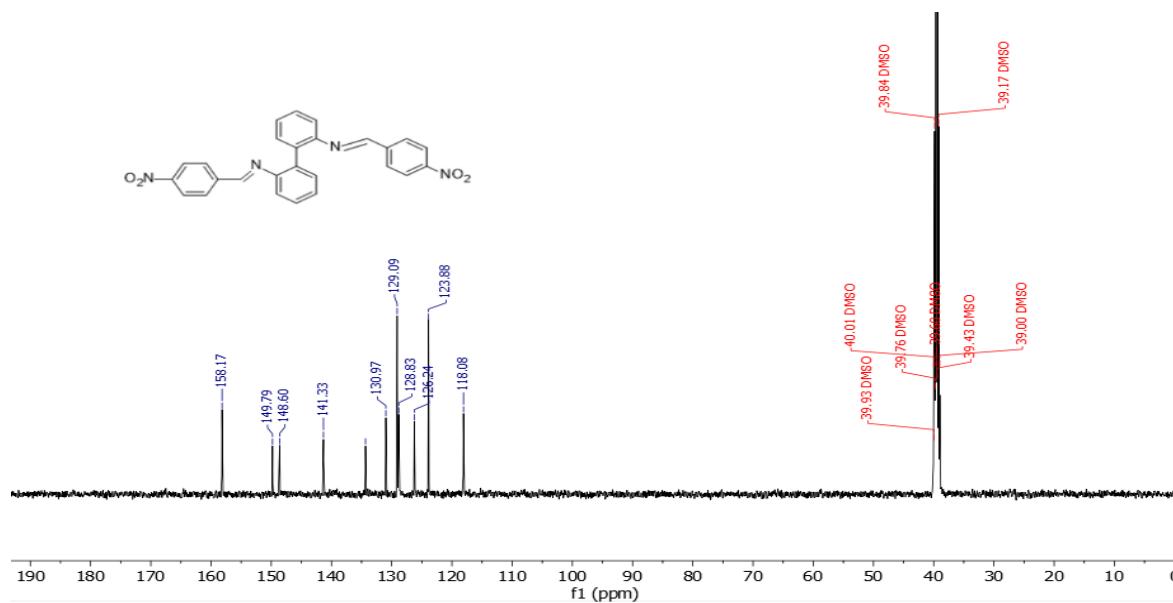

Figure S23. <sup>13</sup>C NMR of chemosensor S3 in DMSO-*d*<sub>6</sub>

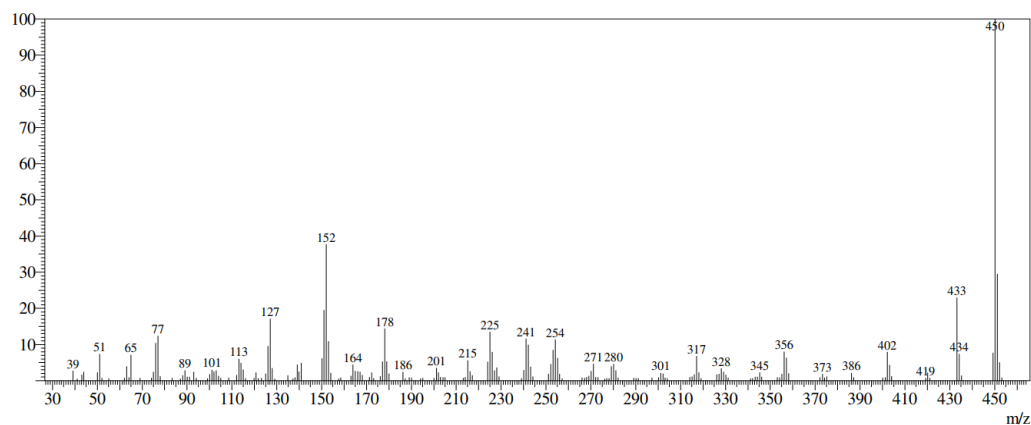

**Figure S24 Mass spectrum of sensors S1**

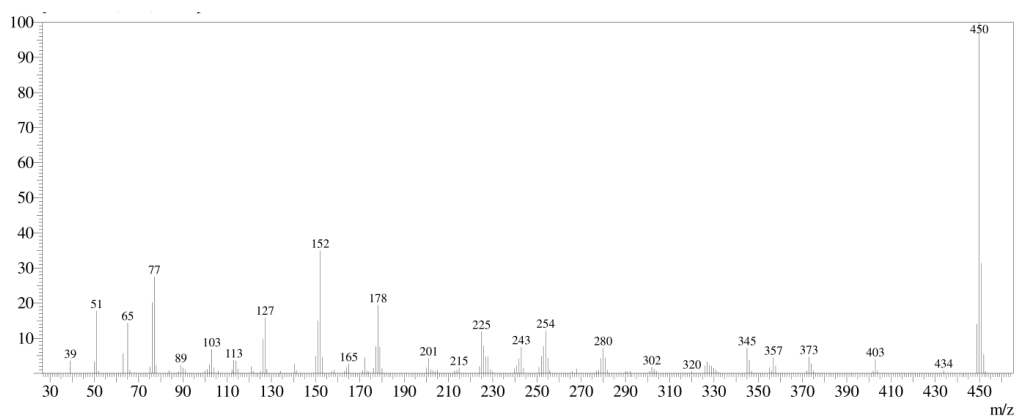

**Figure S25. Mass spectrum of sensor S2.**

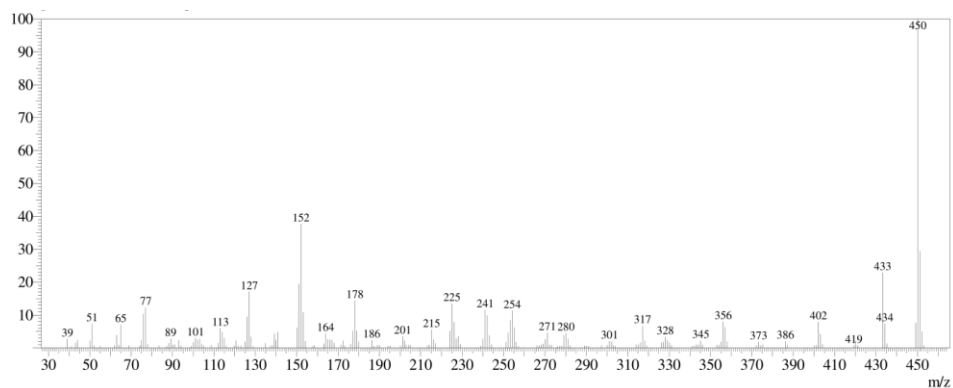

**Figure S26. Mass spectrum of sensor S3**

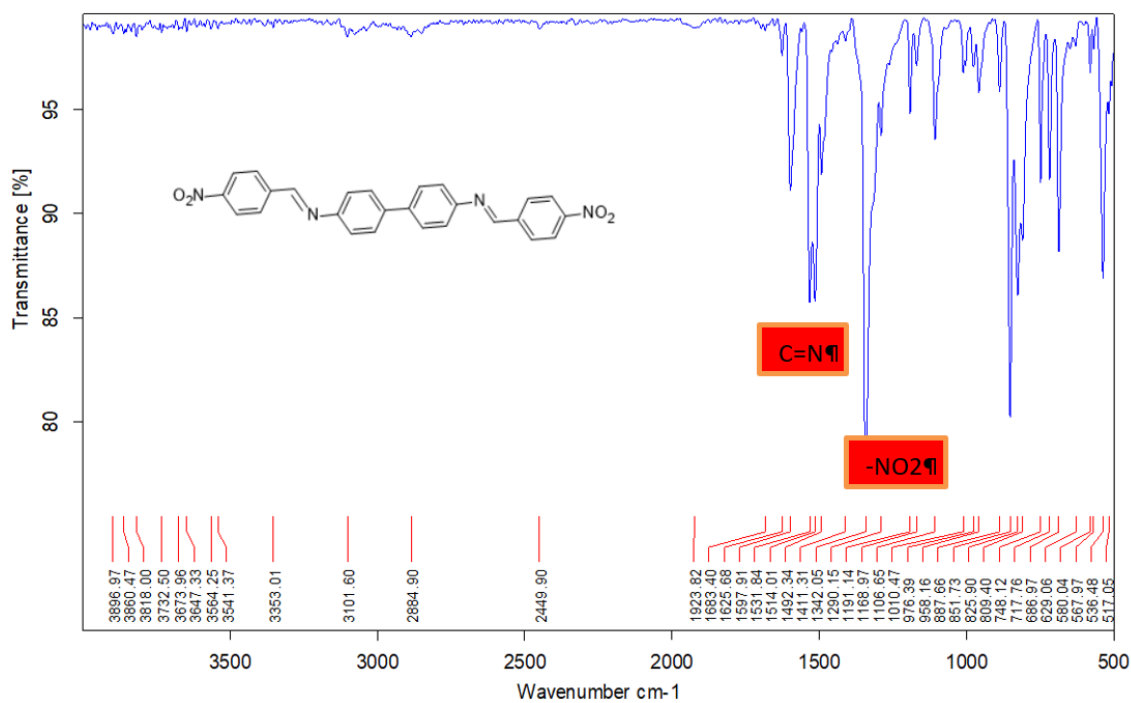

**Figure S27 IR spectrum of sensor S1**

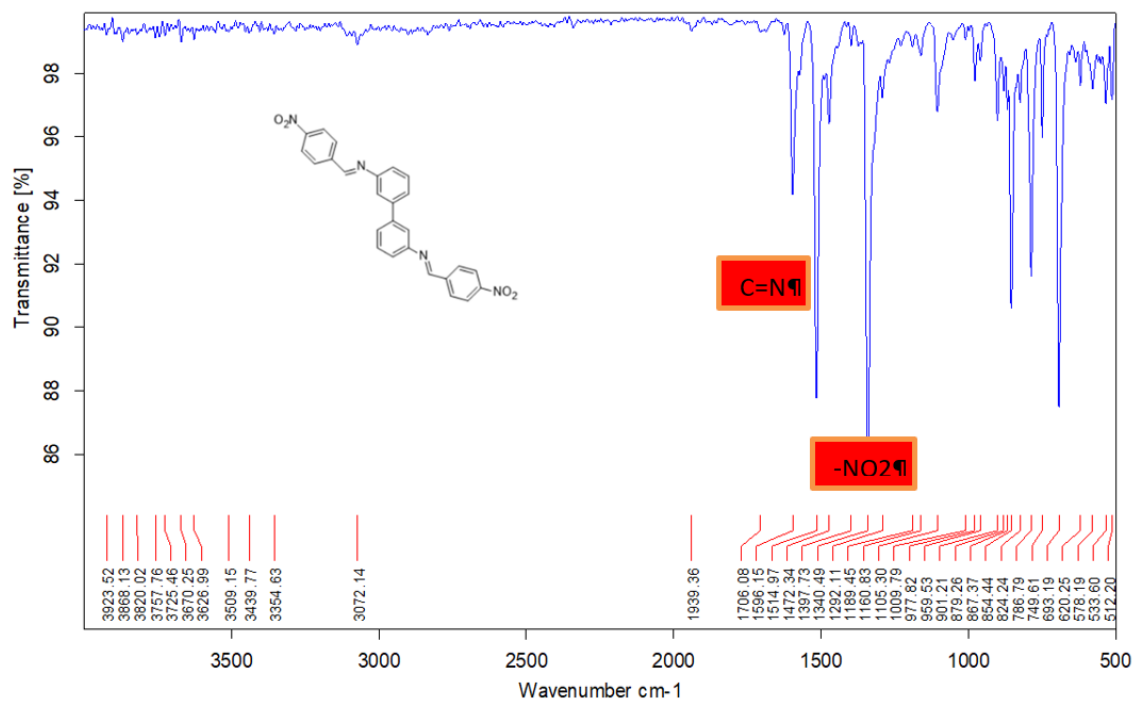

**Figure S28 IR spectrum of sensor S2**

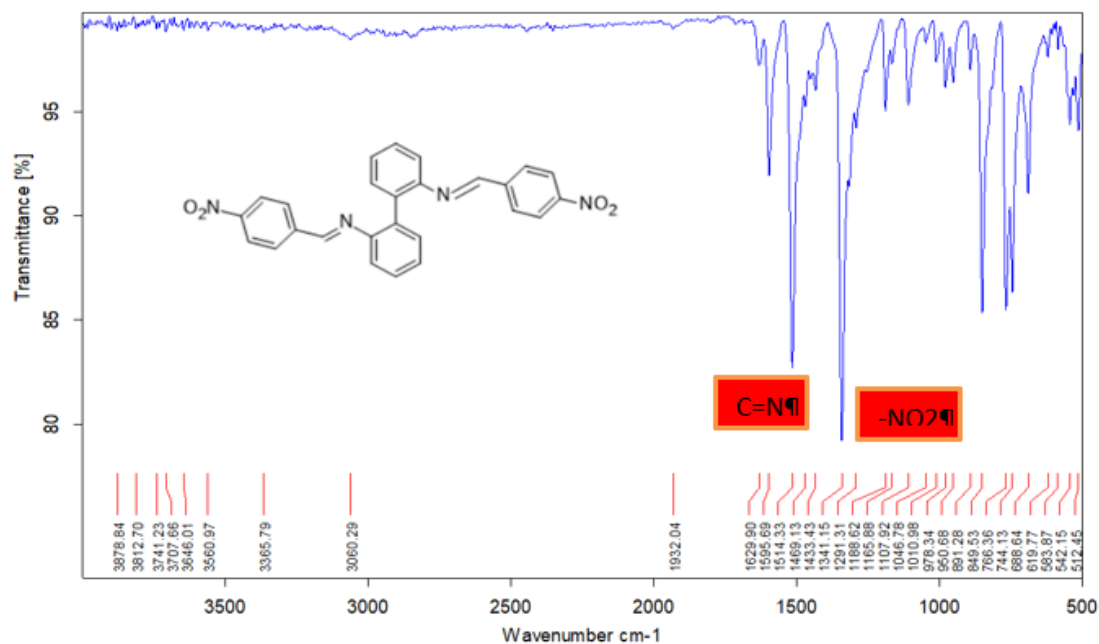

Figure S29 IR spectrum of sensor S3

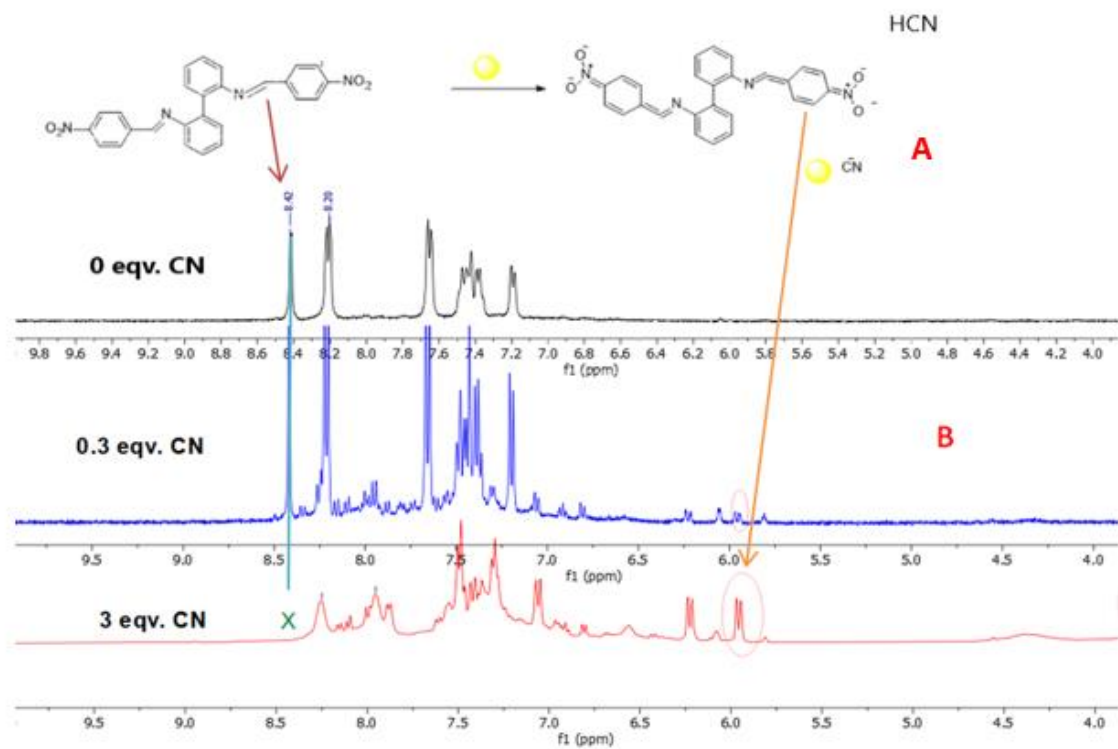

Figure S30. <sup>1</sup>H NMR of sensor S3 before (A) and after (B) adding of TBACN

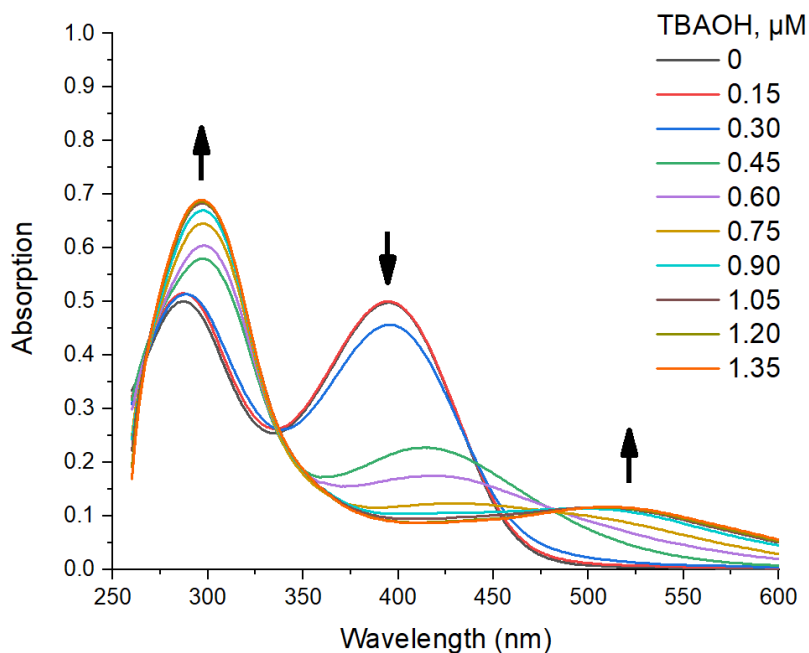

**Figure S31. UV-Vis spectrum of S1 (2x10<sup>-5</sup> M) with various concentration of OH<sup>-</sup> (0-1.35 μM).**

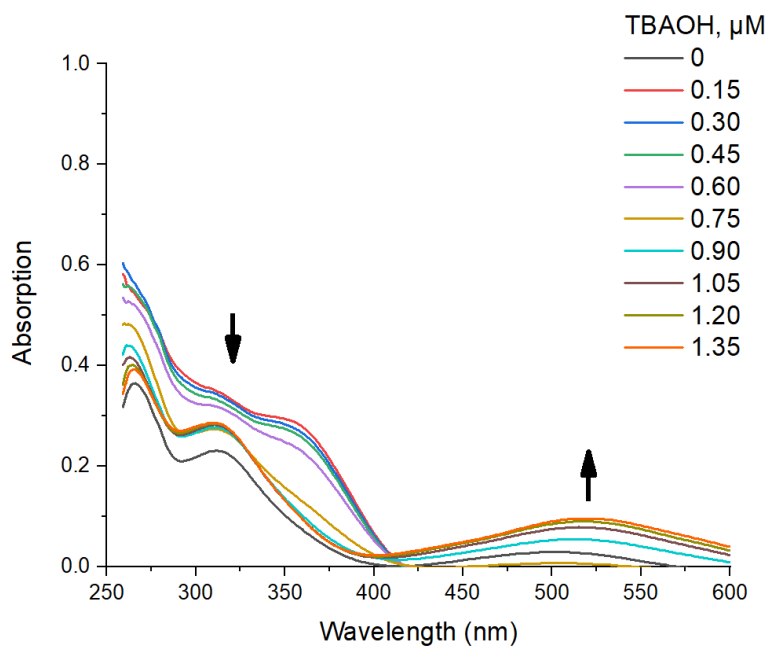

**Figure S32. UV-Vis spectrum of S2 (22 μM) with various concentration of OH<sup>-</sup> (0-1.35 μM).**

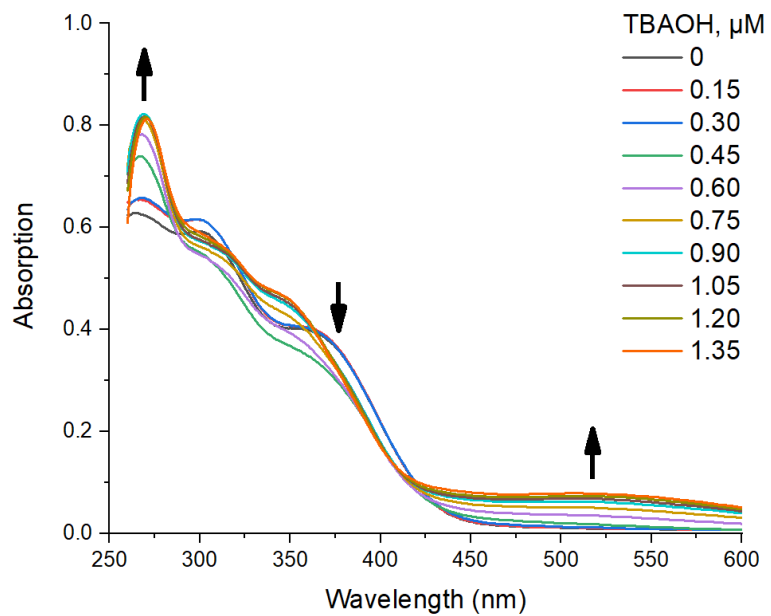

**Figure S33. UV-Vis spectrum of S3 (22  $\mu\text{M}$ ) with various concentration of  $\text{OH}^-$  (0-1.35  $\mu\text{M}$ ).**

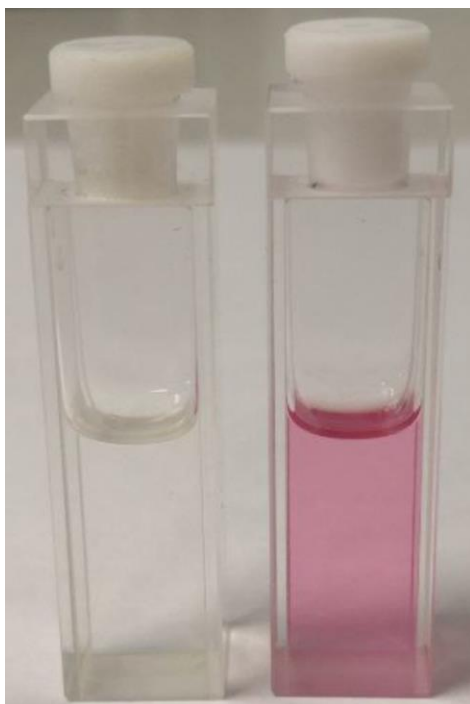

**Figure S34. A photo of S1 sample (left) and S1 with 1.35  $\mu\text{M}$  of TBAOH (right) in DMSO**

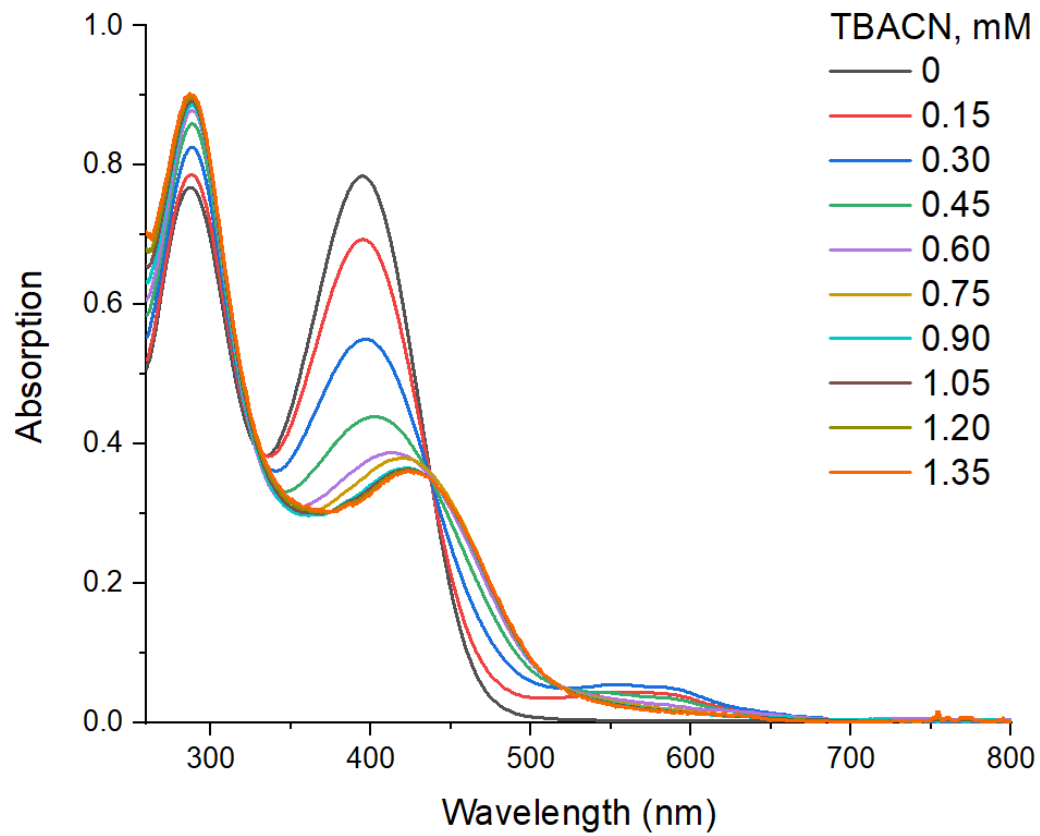

**Figure S35** UV-Vis spectra of S1 (22  $\mu$ M) with various concentration of CN (0-1.35 mM).

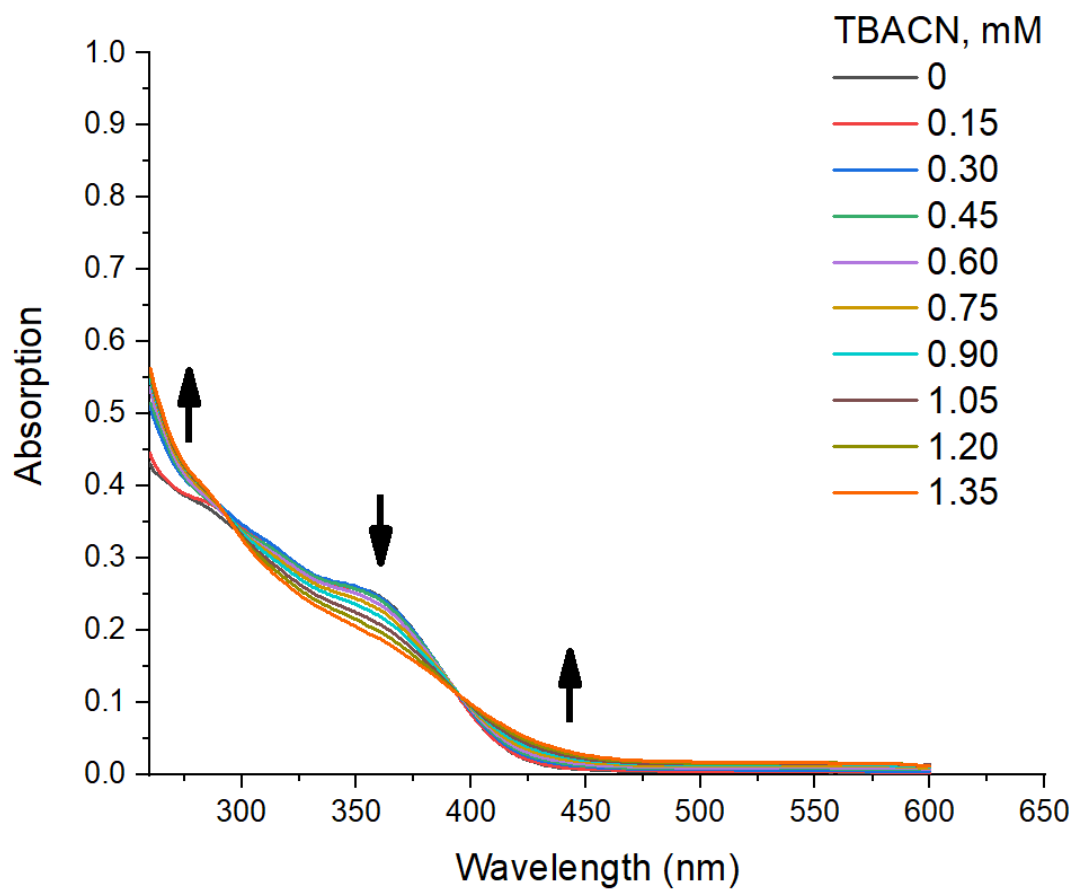

**Figure S36** UV-Vis spectrum of S2 (22  $\mu\text{M}$ ) with various concentration of CN (0-1.35 mM).

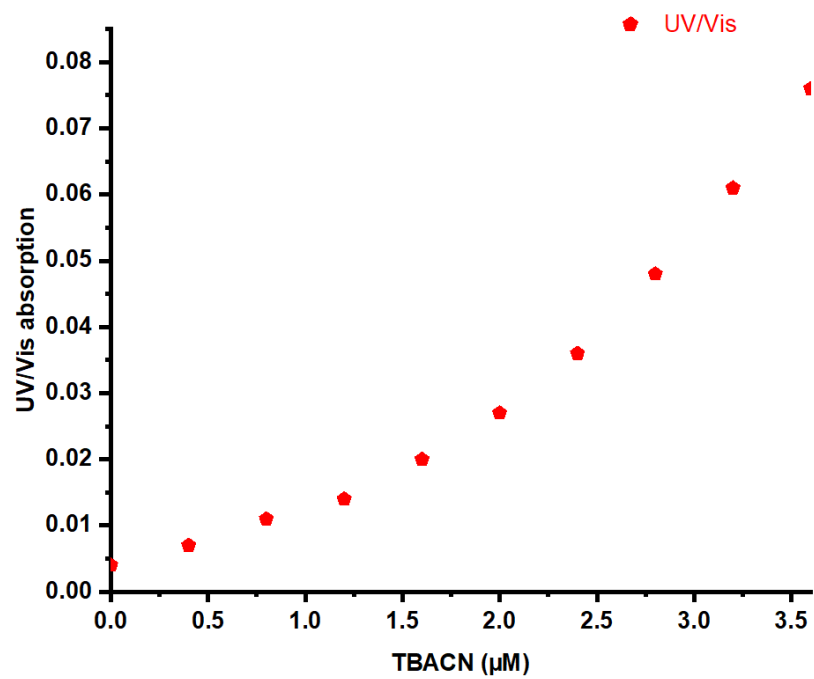

**Figure S37. Relationship between concentration and absorbtion for S3 (at  $\lambda = 550$  nm).**
